# Supplementary material for: Efficacy of dual PI-3K and mTOR inhibitors in vitro and in vivo in acute lymphoblastic leukemia
Source: PubMed Central journal article supplement (PMC4279386; doi:10.18632/oncotarget.2260), 2014-07-25
Supplement: oncotarget-05-10460-s001.pdf [file oncotarget-05-10460-s001.pdf]

## Efficacy of dual PI-3K and mTOR inhibitors *in Vitro* and *in Vivo* in acute lymphoblastic leukemia

### Supplementary Material

**Table S1: Clinical information**

| Patient ID | Sex/Age | Immuno-phenotype                                                           | Cytogenetics                                                            |
|------------|---------|----------------------------------------------------------------------------|-------------------------------------------------------------------------|
| 1786       | F/12    | CD10 <sup>+</sup> CD34 <sup>-</sup><br>CD20 <sup>+</sup>                   | No metaphases                                                           |
| 2070       | M/65    | CD34 <sup>+</sup> CD10 <sup>+</sup><br>CD20 <sup>+</sup> CD45 <sup>+</sup> | 45XY t(9;22)(q34;q11.2)del(9)(p21)                                      |
| 0398       | M/15    | CD10 <sup>-</sup> CD34 <sup>+</sup>                                        | 46XY add(3)(q29)t(14;19)(q32p13)                                        |
| 1196       | F/8     | CD10 <sup>+</sup> CD34 <sup>-</sup>                                        | 46XX -19,del(19),t(1;19)(q23p13)                                        |
| 1345       | F/5     | CD10 <sup>+</sup>                                                          | 45XX dup(1)(q42q25),del(3)(q21),-9,del(9)(p22),<br>t(18;20)(q21q13.1)   |
| 1809       | M/12    | CD10 <sup>+</sup> CD34 <sup>+</sup>                                        | 46XY,del(4)(q21q25),-9,add(13)(q14),+add(22)(p13)[9]<br>46XY[11]        |
| 0407       | M/45    | CD10 <sup>+</sup> CD34 <sup>-</sup>                                        | t(1;19) <sup>1</sup>                                                    |
| 2032       | M/12    | CD10 <sup>+</sup> CD34 <sup>-</sup>                                        | 46XYadd(9)(p24),del(9)(p21),del(13)(q11q21),der(19)<br>t(1;19)(q23;p13) |

<sup>1</sup>Obtained by PCR.

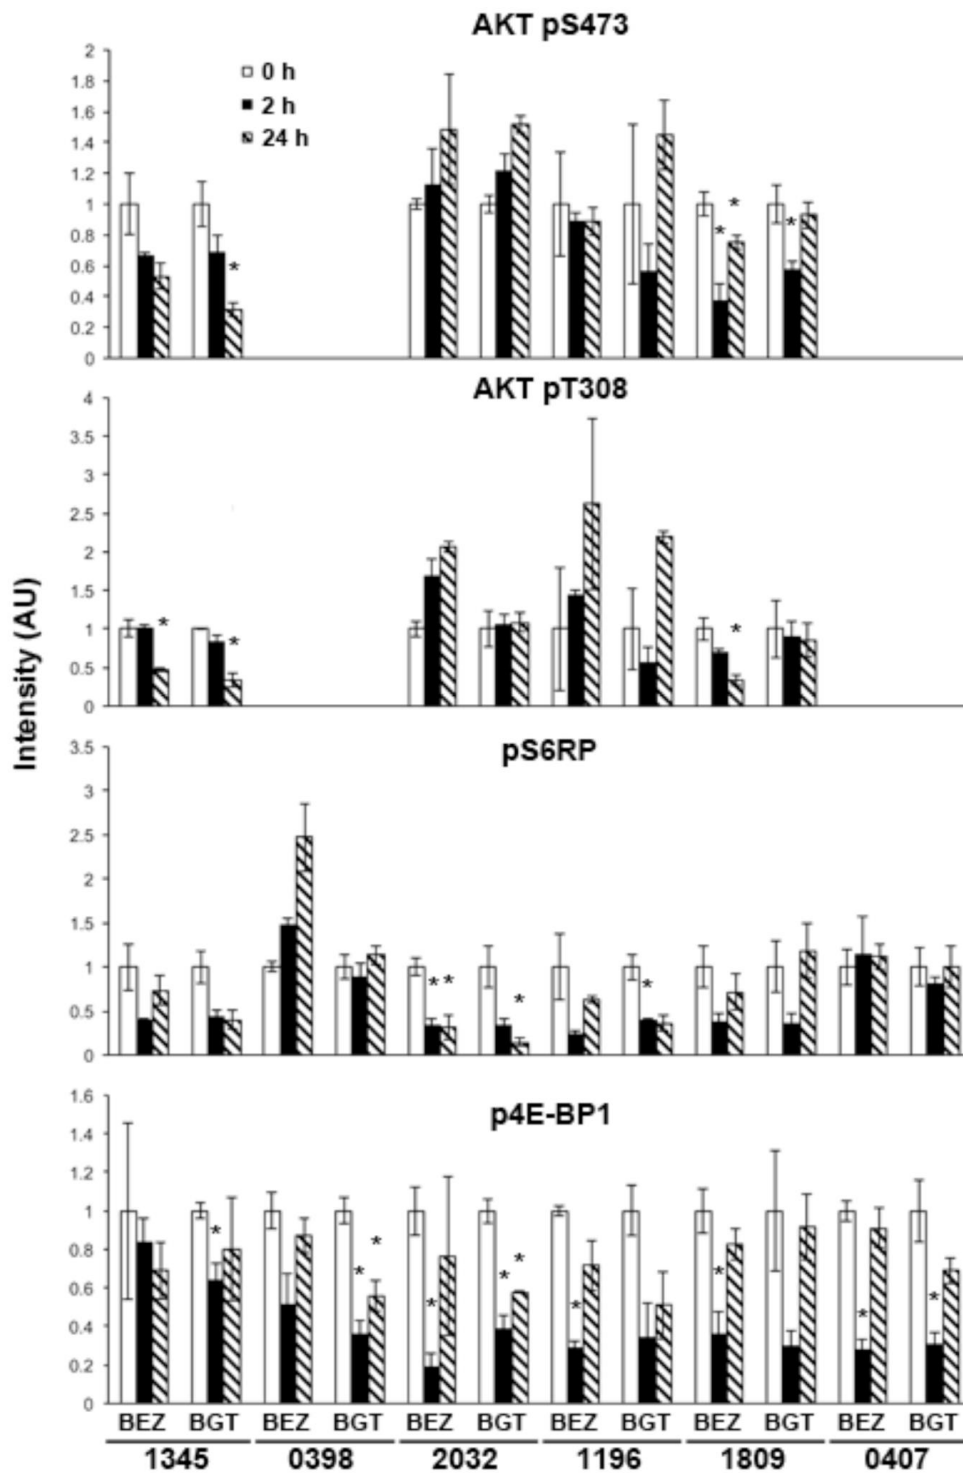

**Figure S1: Densitometry of phosphorylated AKT, S6RP and 4E-BP1.** Densitometry of the blots in figure 5 is shown. The ratio of the phosphorylated band to total protein has been corrected for loading using GAPDH or  $\beta$ -actin as indicated in Figure 5. The mean  $\pm$  SD of replicates is shown. \* $p < 0.05$  compared to control treated cells.

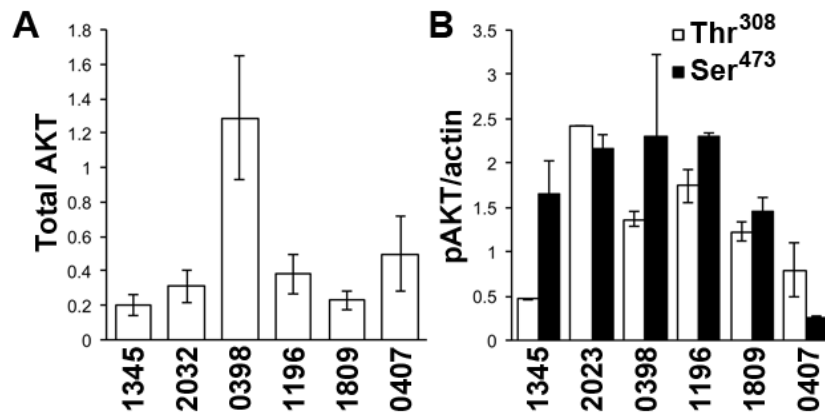

**Figure S2:** Densitometry of the blots in figure 6A is shown. (A) The ratio of the total AKT protein (A) or AKT phosphorylated of Thr<sup>308</sup> or Ser<sup>473</sup> (B) has been corrected for loading using beta-actin. The mean  $\pm$  SD of replicates from two independent gels is shown.

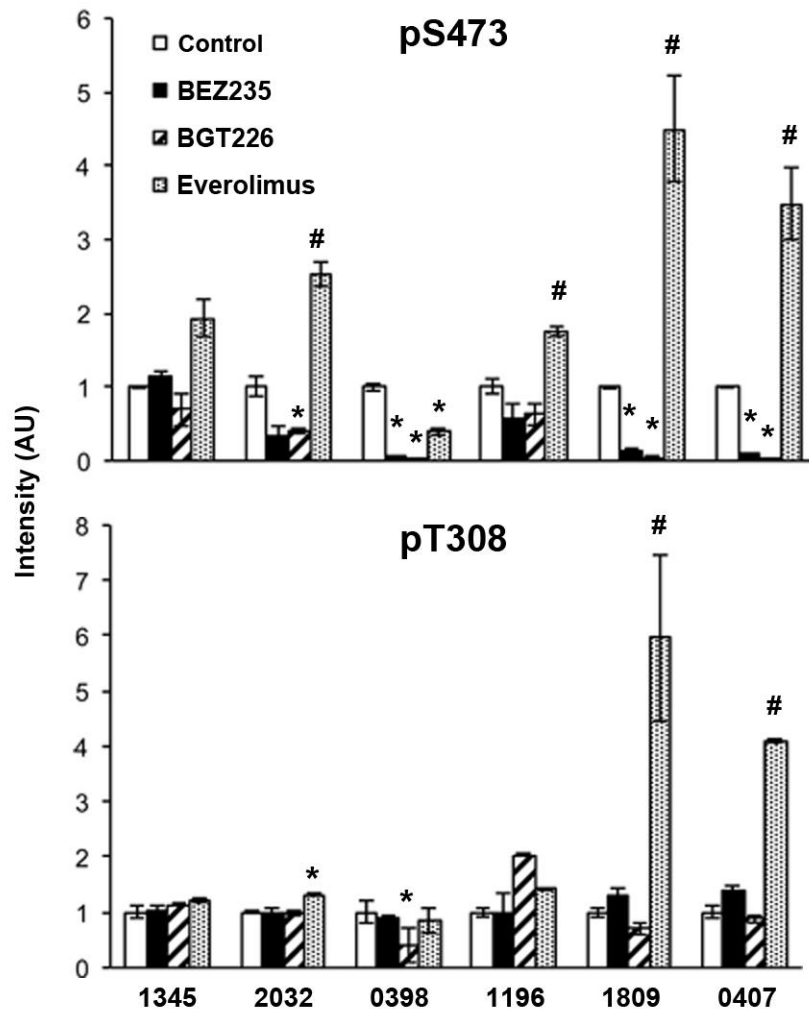

**Figure S3:** Densitometry of the blots in figure 6 is shown. The ratio of the phosphorylated band to total protein has been corrected for loading using GAPDH or beta-actin as indicated in Figure 6. The mean  $\pm$  SD of replicates is shown. \* $p < 0.05$  compared to control treated cells.
